# Supplementary material
Source: Springer Nature journal article supplement (https://www.springermedizin.de/resource/supplementary/12865_2010_364_MOESM4_ESM.pdf/9427840)

**EGFP****3CL<sup>pro</sup>****C145A****DAPI**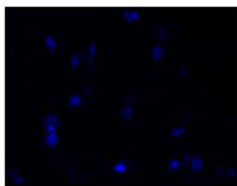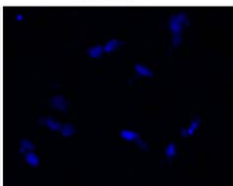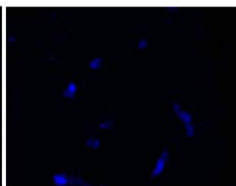**GFP**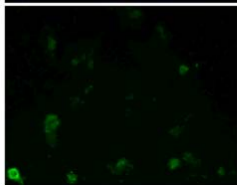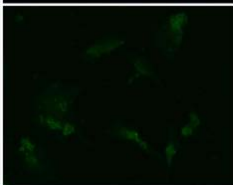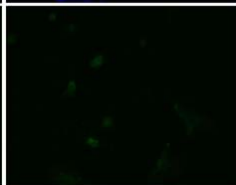**Rhodamine**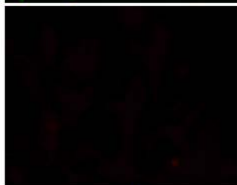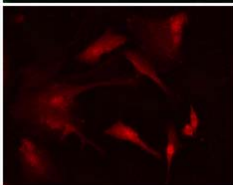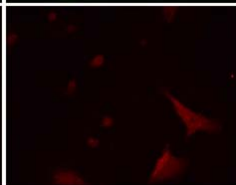**Merge**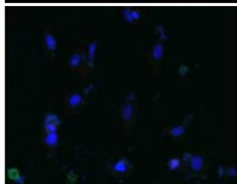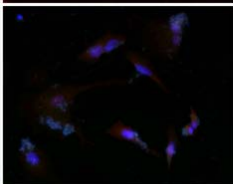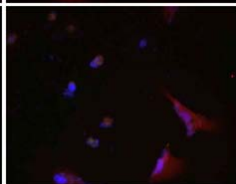

Supplement: MOESM4 [file 9427840]
